# Supplementary material for: Surface-Enhanced Raman Scattering from Dye Molecules in Silicon Nanowire Structures Decorated by Gold Nanoparticles
Source: MDPI journal article supplement (doi:10.3390/ijms23052590), 2022-02-26
Supplement: s1 [file s1]

## Supplementary Materials

# Surface-Enhanced Raman Scattering from Dye Molecules in Silicon Nanowire Structures Decorated by Gold Nanoparticles

Saltanat B. Ikramova <sup>1</sup>, Zhandos N. Utegulov <sup>2,\*</sup>, Kadyrjan K. Dikhanbayev <sup>1</sup>, Abduzhappar E. Gaipov <sup>3</sup>, Renata R. Nemkayeva <sup>4</sup>, Valery G. Yakunin <sup>5</sup>, Vladimir P. Savinov <sup>5</sup> and Victor Yu Timoshenko <sup>5,6,\*</sup>

<sup>1</sup> Faculty of Physics and Technology, Al-Farabi Kazakh National University, 71, Almaty 050040, Kazakhstan; ykramova.saltanat@kaznu.kz (S.B.I.); dksolar2017@gmail.com (K.K.D.)

<sup>2</sup> Department of Physics, School of Sciences and Humanities, Nazarbayev University, Nur-Sultan 010000, Kazakhstan

<sup>3</sup> Department of Medicine, Nazarbayev University School of Medicine, Nur-Sultan 010000, Kazakhstan; abduzhappar.gaipov@nu.edu.kz

<sup>4</sup> National Nanotechnology Laboratory Open Type, Faculty of Physics and Technology, Al-Farabi Kazakh National University, Almaty 050040, Kazakhstan; quasisensus@mail.ru

<sup>5</sup> Faculty of Physics, Lomonosov Moscow State University, 119991 Moscow, Russia; yvg51@bk.ru (V.G.Y.); savinov1983@yahoo.com (V.P.S.)

<sup>6</sup> Lebedev Physical Institute of the Russian Academy of Sciences, 119991 Moscow, Russia

\* Correspondence: zhutegulov@nu.edu.kz (Z.N.U.); timoshen@physics.msu.ru (V.Y.T.)

## Porosity estimation

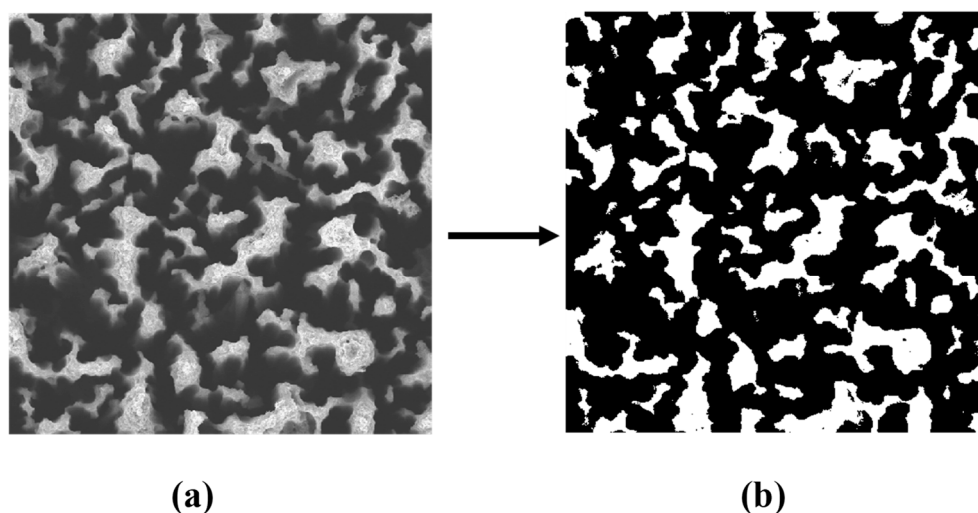

**Figure S1.** Illustration of the box-count method to estimate the porosity of SiNWs arrays: (a) SEM top-view image and (b) the same image in the “black-white” format. Porosity of SiNWs arrays is estimated by using the following equation:

$$P = 1 - \frac{N_w}{N_w + N_b} \quad (S1)$$

where  $N_w$  and  $N_b$  are numbers of black and white pixels, respectively.

## EDX analysis

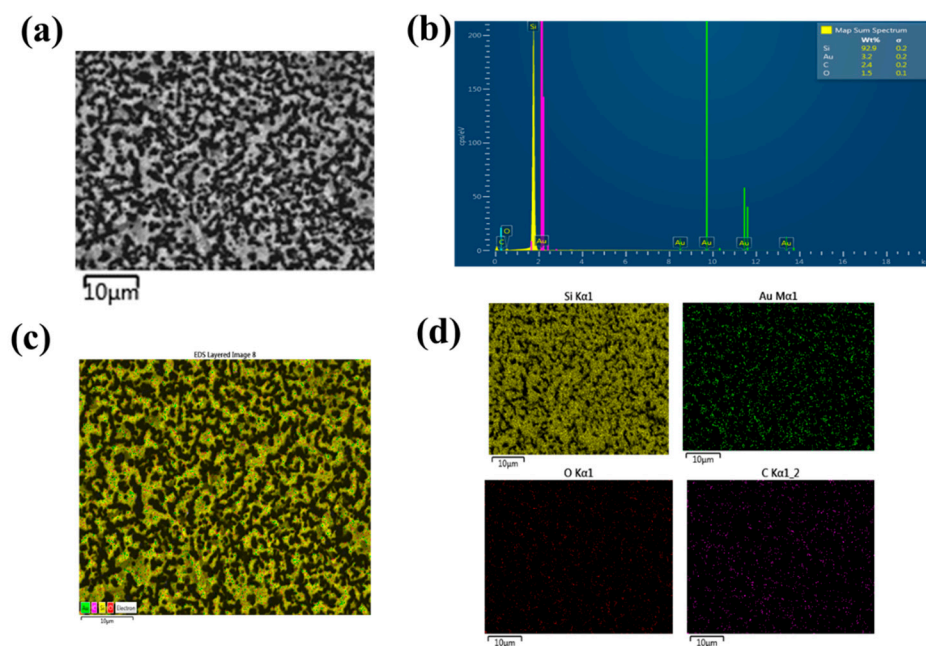

**Figure S2.** (a) SEM image of SiNWs:Au-NPs ( $P = 55\%$ ), (b) EDX spectrum of this sample, (c) merged elemental image and (d) images for selected elements (Si, Au, O, C).

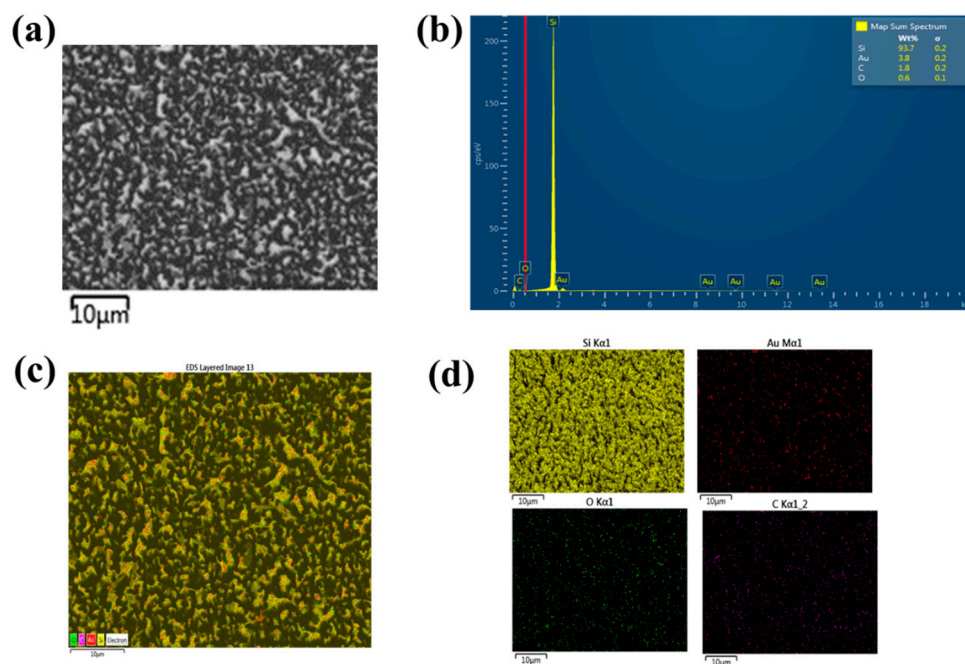

**Figure S3.** (a) SEM image of SiNWs:Au-NPs ( $P = 72\%$ ), (b) EDX spectrum of this sample, (c) merged elemental image and (d) images for selected elements (Si, Au, O, C).

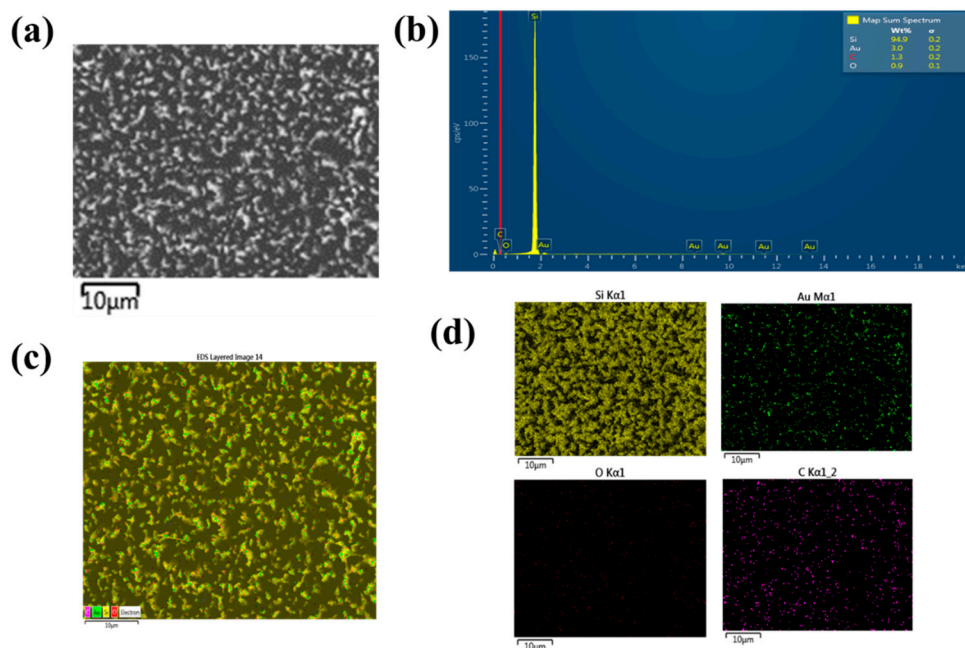

**Figure S4.** (a) SEM image of SiNWs:Au-NPs ( $P = 83\%$ ), (b) EDX spectrum of this sample, (c) merged elemental image and (d) images for selected elements (Si, Au, O, C).

**Table S1.** Summarized results of the elemental content of SiNWs:Au-NPs with different porosity.

| Samples    | Elements | Wt(%) | At (%) |
|------------|----------|-------|--------|
| $P = 55\%$ | Si       | 92.9  | 91.5   |
|            | Au       | 3.2   | 0.4    |
|            | C        | 2.4   | 5.5    |
|            | O        | 1.5   | 2.6    |
| $P = 72\%$ | Si       | 93.7  | 94.0   |
|            | Au       | 3.8   | 0.5    |
|            | C        | 1.8   | 4.2    |
|            | O        | 0.7   | 1.3    |
| $P = 83\%$ | Si       | 94.9  | 95.1   |
|            | Au       | 3.0   | 0.4    |
|            | C        | 1.2   | 2.8    |
|            | O        | 0.9   | 1.6    |

#### EF estimation

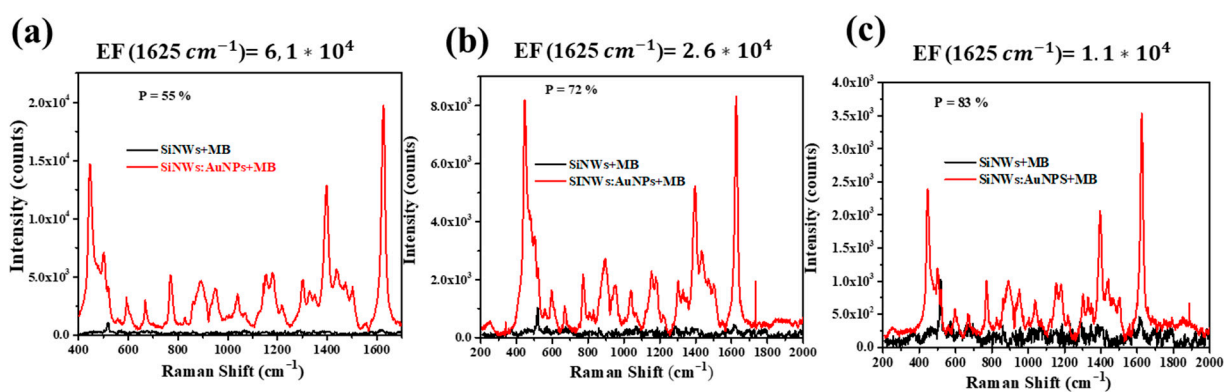

**Figure S5.** SERS spectra for SiNWs and SiNWs: Au-NPs with deposited MB ( $1\ \mu\text{M}$ ) for the samples with different porosity: (a)  $P = 55\%$ , (b)  $P = 72\%$ , and (c)  $P = 83\%$ . The spectra are shown after subtraction of the photoluminescent background.

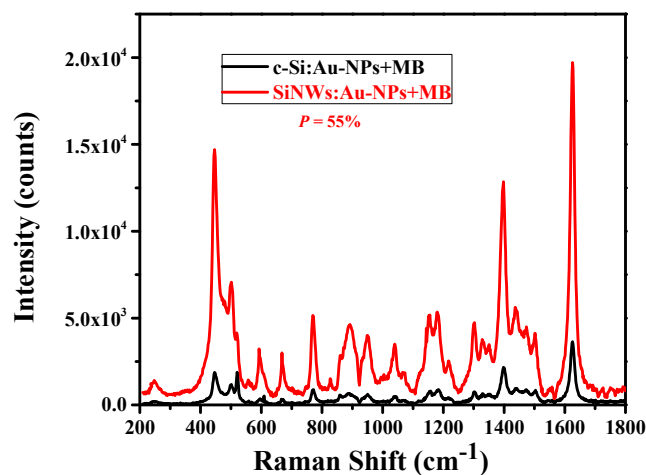

**Figure S6.** SERS spectra of MB ( $1\ \mu\text{M}$ ) deposited on c-Si: Au-NPs (black line) and SiNWs: Au-NPs with  $P = 55\%$  (red line). The spectra are shown after subtraction of the photoluminescent background.

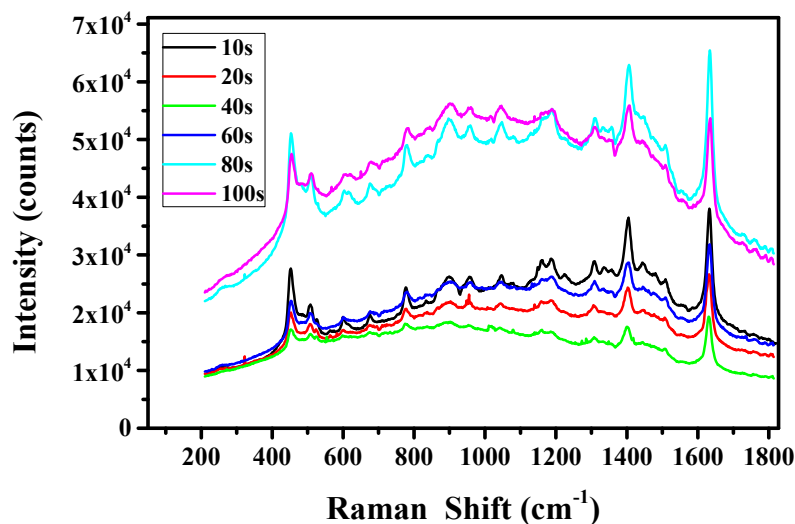

**Figure S7.** Spectra of the Raman scattering and photoluminescence of MB ( $1\ \mu\text{M}$ ) for samples of SiNWs: Au-NPs with  $P = 55\%$  and different time of Au-NP deposition varied from 10 to 100 s.
